# Supplementary material for: Exercise can improve sleep quality: a systematic review and meta-analysis
Source: PeerJ. 2018 Jul 11;6:e5172. doi: 10.7717/peerj.5172 (PMC6045928; doi:10.7717/peerj.5172)
Supplement: Table S4 [file peerj-06-5172-s025.xlsx]

## Sheet: Sheet1
	Table S4. Data and analyses
	1 Sleep quality: exercise versus control							2 Sleep efficiency: exercise versus control								3 Severity of insomnia: exercise versus control								4 Health related QOL: exercise versus control								5 Sleep onset latency: exercise versus control								6 Total sleep time: exercise versus control									7 Sleepiness during daily lives: exercise versus control
	Outcome or Subgroup	Studies	Participants	Statistical Method	Effect Estimate	Test for subgroup differences		Outcome or Subgroup	Studies	Participants	Statistical Method	Effect Estimate				Outcome or Subgroup	Studies	Participants	Statistical Method	Effect Estimate				Outcome or Subgroup	Studies	Participants	Statistical Method	Effect Estimate				Outcome or Subgroup	Studies	Participants	Statistical Method	Effect Estimate				Outcome or Subgroup	Studies	Participants	Statistical Method	Effect Estimate					Outcome or Subgroup
	1.1 Total PSQI score	6	361	Mean Difference (IV, Random, 95% CI)	-2.87 [-3.95, -1.79]			2.1 Sleep efficiency (%)	4	186	Mean Difference (IV, Random, 95% CI)	-0.56 [-3.42, 2.31]				3.1 Total ISI score	2	66	Mean Difference (IV, Random, 95% CI)	-3.22 [-5.36, -1.07]				4.1 SF-36 PCS score	1	71	Mean Difference (IV, Random, 95% CI)	14.35 [9.25, 19.45]				5.1 Sleep onset latency (min)	5	206	Mean Difference (IV, Random, 95% CI)	1.90 [-3.63, 7.43]				6.1 Total sleep time (min)	5	206	Mean Difference (IV, Random, 95% CI)	4.32 [-9.19, 17.84]					7.1 Total ESS score
	1.2 Subgroup analysis (PSQI) by primary insomnia and secondary insomnia	6		Mean Difference (IV, Random, 95% CI)	Subtotals only	Chi² = 0.36, df = 2 (P = 0.84), I² = 0%		2.2 Sensitivity analysis (sleep efficiency) by repeating the analysis restricting study with low risk of selection bias (i.e. adequate random sequence generation and random allocation)	2	108	Mean Difference (IV, Random, 95% CI)	0.56 [-2.96, 4.09]				3.2 Sensitivity analysis (total ISI score) by repeating the analysis restricting study with low risk of selection bias (i.e. adequate random sequence generation and random allocation)	0	0	Mean Difference (IV, Random, 95% CI)	Not estimable				4.2 SF-36 MCS score	1	71	Mean Difference (IV, Random, 95% CI)	13.85 [8.62, 19.08]
	1.2.1 Primary insomnia	2	90	Mean Difference (IV, Random, 95% CI)	-2.97 [-5.71, -0.23]			2.3 Sensitivity analysis (sleep efficiency) by repeating analysis using fixed effect model instead of random-effects model	4	186	Mean Difference (IV, Fixed, 95% CI)	-0.56 [-3.42, 2.31]				3.3 Sensitivity analysis (total ISI score) by repeating analysis using fixed effect model instead of random-effects model	2	66	Mean Difference (IV, Fixed, 95% CI)	-3.22 [-5.36, -1.07]				4.3 SF-36 Physical function	1	17	Mean Difference (IV, Random, 95% CI)	15.90 [5.48, 26.32]
	1.2.2 Secondary insomnia	1	71	Mean Difference (IV, Random, 95% CI)	-3.33 [-4.71, -1.95]			2.4 Sensitivity analysis (sleep efficiency) by exclusion of studies using imputed statistics and studies using per protocol analysis	1	48	Mean Difference (IV, Random, 95% CI)	-0.50 [-8.31, 7.31]				3.4 Sensitivity analysis (total ISI score) by exclusion of studies using imputed statistics and studies using per protocol analysis	0	0	Mean Difference (IV, Random, 95% CI)	Not estimable				4.4 SF-36 Role emotional	1	17	Mean Difference (IV, Random, 95% CI)	34.77 [0.92, 68.62]
	1.2.3 Primary and secondary insomnia	3	200	Mean Difference (IV, Random, 95% CI)	-2.59 [-4.60, -0.58]																			4.5 SF-36 Bodily pain	1	17	Mean Difference (IV, Random, 95% CI)	15.66 [-3.75, 35.07]
	1.3 Subgroup analysis (PSQI) by duration of exercise	6		Mean Difference (IV, Random, 95% CI)	Subtotals only	Chi² = 0.20, df = 1 (P = 0.66), I² = 0%																		4.6 SF-36 Vitality	1	17	Mean Difference (IV, Random, 95% CI)	26.23 [15.23, 37.23]
	1.3.1 Medium-term	5	325	Mean Difference (IV, Random, 95% CI)	-2.79 [-4.03, -1.55]																			4.7 SF-36 General health	1	17	Mean Difference (IV, Random, 95% CI)	10.36 [0.01, 20.71]
	1.3.2 Long-term	1	36	Mean Difference (IV, Random, 95% CI)	-3.36 [-5.55, -1.17]																			4.8 SF-36 Social function	1	17	Mean Difference (IV, Random, 95% CI)	13.04 [1.52, 24.56]
	1.4 Subgroup analysis (PSQI) by intensity of exercise	6		Mean Difference (IV, Random, 95% CI)	Subtotals only	Chi² = 2.92, df = 1 (P = 0.09), I² = 65.7%																		4.9 SF-36 Mental health	1	17	Mean Difference (IV, Random, 95% CI)	5.14 [-3.36, 13.64]
	1.4.1 Aerobic exercise	5	344	Mean Difference (IV, Random, 95% CI)	-2.59 [-3.77, -1.40]																			4.10 SF-36 Role physical	1	17	Mean Difference (IV, Random, 95% CI)	24.64 [-4.84, 54.12]
	1.4.2 Aerobic exercise and anaerobic exercise	1	17	Mean Difference (IV, Random, 95% CI)	-4.40 [-6.11, -2.69]																			4.11 Menopause-Specific Quality of Life Questionnaire (MENQOL)	1	30	Mean Difference (IV, Random, 95% CI)	-39.10 [-66.83, -11.37]
	1.5 Subgroup analysis (PSQI) by type of exercise	6		Mean Difference (IV, Random, 95% CI)	Subtotals only	Chi² = 14.40, df = 2 (P = 0.0007), I² = 86.1%																		4.12 EuroQoL5D-5L	1	35	Mean Difference (IV, Random, 95% CI)	0.06 [0.03, 0.09]
	1.5.1 Aerobic exercise (walking)	3	219	Mean Difference (IV, Random, 95% CI)	-3.57 [-4.28, -2.86]																			4.13 SF-12v2 PCS score	1	52	Mean Difference (IV, Random, 95% CI)	10.25 [4.24, 16.26]
	1.5.2 Other aerobic exercise	2	125	Mean Difference (IV, Random, 95% CI)	-1.16 [-2.33, 0.02]																			4.14 SF-12v2 MCS score	1	52	Mean Difference (IV, Random, 95% CI)	6.48 [2.33, 10.63]
	1.5.3 Aerobic exercise (walking, other aerobic exercise)	1	17	Mean Difference (IV, Random, 95% CI)	-4.40 [-6.11, -2.69]
	1.6 Subgroup analysis (PSQI) by setting or location of exercise	6		Mean Difference (IV, Random, 95% CI)	Subtotals only	Chi² = 1.39, df = 1 (P = 0.24), I² = 27.9%
	1.6.1 At home	3	219	Mean Difference (IV, Random, 95% CI)	-3.57 [-4.28, -2.86]
	1.6.2 Elsewhere	3	142	Mean Difference (IV, Random, 95% CI)	-2.18 [-4.38, 0.03]
	1.7 Subgroup analysis (PSQI) by background	6		Mean Difference (IV, Random, 95% CI)	Subtotals only	Chi² = 1.62, df = 2 (P = 0.44), I² = 0.0%
	1.7.1 Cancer patients	1	71	Mean Difference (IV, Random, 95% CI)	-3.33 [-4.71, -1.95]
	1.7.2 Postmenopausal women	1	112	Mean Difference (IV, Random, 95% CI)	-3.70 [-4.60, -2.80]
	1.7.3 Others	4	178	Mean Difference (IV, Random, 95% CI)	-2.44 [-4.17, -0.71]
	1.8 Sensitivity analysis (PSQI) by repeating the analysis restricting study with low risk of selection bias (i.e. adequate random sequence generation and random allocation)	3	161	Mean Difference (IV, Random, 95% CI)	-1.72 [-3.18, -0.25]
	1.9 Sensitivity analysis (PSQI) by repeating analysis using fixed effect model instead of random-effects model	6	361	Mean Difference (IV, Fixed, 95% CI)	-3.09 [-3.66, -2.51]
	1.10 Sensitivity analysis (PSQI) by exclusion of studies using imputed statistics and studies using per protocol analysis	2	164	Mean Difference (IV, Random, 95% CI)	-2.21 [-5.34, 0.92]
[truncated: 24 more columns]
